# Supplementary material for: Combined immune checkpoint protein blockade and low dose whole body irradiation as immunotherapy for myeloma
Source: PubMed Central journal article supplement (PMC4302511; doi:10.1186/s40425-014-0043-z), 2015-01-20

Figure S1

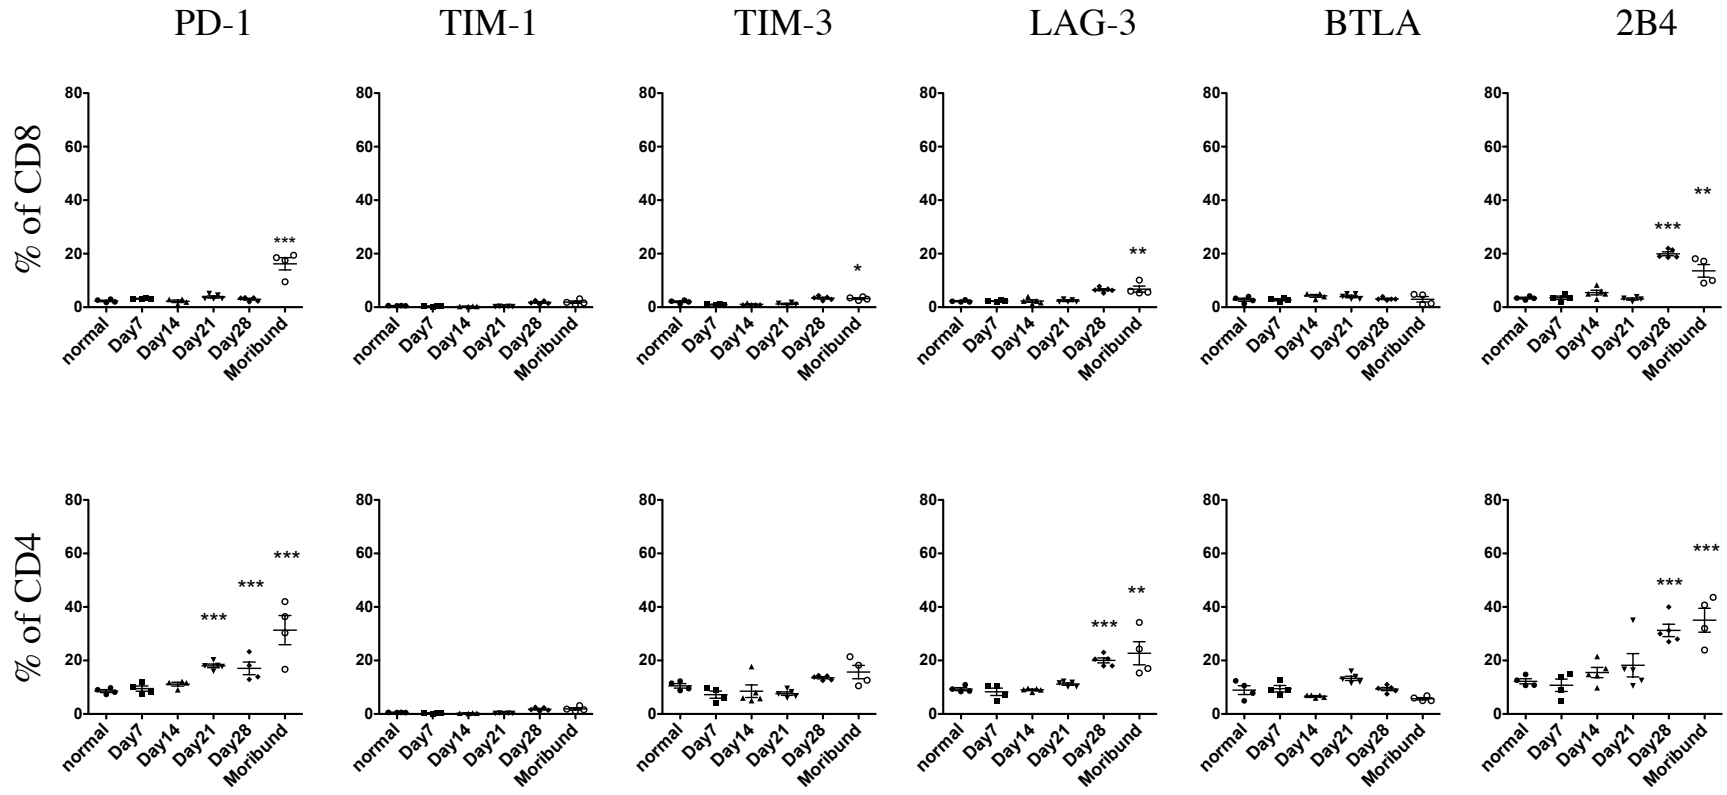

Supplement: 40425_2014_43_MOESM1_ESM.pdf [file 40425_2014_43_MOESM1_ESM.pdf]
